# Supplementary material
Source: PubMed Central journal article supplement (PMC5048219)
Supplement: NIHMS801601-supplement-ExtDataTable_2.pdf [file NIHMS801601-supplement-ExtDataTable_2.pdf]

| Reich ID | Pop Label for Analysis        | Culture              | Group | Location and sample details (e.g. sample, grave and museum ID)            | Date (lab no.)                   | Country | Sex | mt-hg              | Y-hg       | Autosomal SNPs |
|----------|-------------------------------|----------------------|-------|---------------------------------------------------------------------------|----------------------------------|---------|-----|--------------------|------------|----------------|
| 10061    | Karelia_HG                    | Russian Mesolithic   | EHG   | Yuzhnyy Oleni Ostrov, Karelia, Russia; Uz0074, grave 142, MAE RAS 5773-74 | 5500-5000 BC                     | Russia  | M   | C1g (formerly C1f) | R1a1       | 341554         |
| 10124    | Samara_HG                     | Russian Neolithic HG | EHG   | Sok River, Samara, Russia; SVP44                                          | 5650-5555 cal BC (Beta – 392490) | Russia  | M   | U5a1d              | R1b1       | 206748         |
| 10011    | Motala_HG                     | Swedish Mesolithic   | SHG   | Motala, Sweden; Motala 1                                                  | 5898-5531 cal BC                 | Sweden  | F   | U5a1               |            | 228271         |
| 10012    | Motala_HG                     | Swedish Mesolithic   | SHG   | Motala, Sweden; Motala 2                                                  | 5898-5531 cal BC                 | Sweden  | M   | U2e1               | I2c2       | 292853         |
| 10013    | Motala_HG                     | Swedish Mesolithic   | SHG   | Motala, Sweden; Motala 3                                                  | 5898-5531 cal BC                 | Sweden  | M   | U5a1               | I2a1b      | 251108         |
| 10014    | Motala_HG                     | Swedish Mesolithic   | SHG   | Motala, Sweden; Motala 4                                                  | 5898-5531 cal BC                 | Sweden  | F   | U5a2d              |            | 311299         |
| 10015    | Motala_HG                     | Swedish Mesolithic   | SHG   | Motala, Sweden; Motala 6                                                  | 5898-5531 cal BC                 | Sweden  | M   | U5a2d              | I2a1       | 285307         |
| 10016    | Motala_HG                     | Swedish Mesolithic   | SHG   | Motala, Sweden; Motala 9                                                  | 5898-5531 cal BC                 | Sweden  | M   | U5a2               | I2a1       | 275233         |
| 10017    | Motala_HG                     | Swedish Mesolithic   | SHG   | Motala, Sweden; Motala 12                                                 | 5898-5531 cal BC                 | Sweden  | M   | U2e1               | I2a1b      | 337794         |
| 10174    | Starcevo_EN                   | Starcevo             | EN    | Aisónyék-Bátaszék, Mémónki telep, Hungary; BAM25a, feature 1532           | 5710-5550 cal BC (MAMS 11939)    | Hungary | M   | N1a1a1b            |            | 101653         |
| 10176    | LBKT_EN                       | LBKT                 | EN    | Szemenly-Hégyes, Hungary; SZEH4b, feature 1001                            | 5210-4940 cal BC (Beta - 310038) | Hungary | M   | N1a1a1a3           | H2         | 30718          |
| 10046    | LBK_EN                        | LBK                  | EN    | Halberstadt-Sonntagsfeld, Germany; HAL5, grave 2, feature 241.1           | 5206-5004 cal BC (MAMS 21479)    | Germany | F   | T2c1de1f           |            | 266764         |
| 10048    | LBK_EN                        | LBK                  | EN    | Halberstadt-Sonntagsfeld, Germany; HAL25, grave 28, feature 861           | 5206-5052 cal BC (MAMS 21482)    | Germany | M   | K1a                | G2a2a      | 123828         |
| 10056    | LBK_EN                        | LBK                  | EN    | Halberstadt-Sonntagsfeld, Germany; HAL14, grave 15, feature 430           | 5206-5052 cal BC (MAMS 21480)    | Germany | M   | T2b(8)             | G2a2a      | 136578         |
| 10057    | LBK_EN                        | LBK                  | EN    | Halberstadt-Sonntagsfeld; HAL34, grave 38, feature 992                    | 5207-5067 cal BC (MAMS 21483)    | Germany | F   | N1a1a1             |            | 55802          |
| 10100    | LBK_EN                        | LBK                  | EN    | Halberstadt-Sonntagsfeld; HAL4, grave 1, feature 139                      | 5032-4946 cal BC (KIA40341)      | Germany | F   | N1a1a1a            |            | 342342         |
| 10659    | LBK_EN                        | LBK                  | EN    | Halberstadt-Sonntagsfeld, Germany; HAL2, grave 35, feature 999            | 5079-4997 cal BC (KIA40350)      | Germany | M   | N1a1a              | G2a2a1     | 191007         |
|          |                               |                      |       |                                                                           | 5066-4979 cal BC (KIA30408)      |         |     |                    |            |                |
| 10821    | LBK_EN                        | LBK                  | EN    | Halberstadt-Sonntagsfeld, Germany; HAL24, grave 27, feature 867           | 5034-4942 cal BC (KIA40348)      | Germany | M   | Pre-X2d1           | G2a2a1     | 55914          |
| 10795    | LBK_EN                        | LBK                  | EN    | Karsdorf, Germany; KAR6a, feature 170                                     | 5207-5070 cal BC (MAMS 22823)    | Germany | M   | H1                 | T1a        | 47804          |
| 10054    | LBK_EN                        | LBK                  | EN    | Oberwiederstedt-Untewiederstedt, UWS4, Germany, grave 6, feature 1 14     | 5209-5070 cal BC (MAMS 21485)    | Germany | F   | J1c17              |            | 337625         |
| 10022    | LBK_EN                        | LBK                  | EN    | Viesenhäuser Hof, Stuttgart-Mühlhausen, Germany; LBK1976                  | 5500-4800 BC                     | Germany | F   | T2e                |            | 160852         |
| 10025    | LBK_EN                        | LBK                  | EN    | Viesenhäuser Hof, Stuttgart-Mühlhausen, Germany; LBK1992                  | 5500-4800 BC                     | Germany | F   | T2b                |            | 307686         |
| 10026    | LBK_EN                        | LBK                  | EN    | Viesenhäuser Hof, Stuttgart-Mühlhausen, Germany; LBK2155                  | 5500-4800 BC                     | Germany | F   | T2b                |            | 315484         |
| 10409    | Spain_EN                      | Els_Trocs            | EN    | Els Trocs, Spain; Troc1                                                   | 5311-5218 cal BC (MAMS 16159)    | Spain   | F   | J1c3               |            | 172903         |
| 10410    | Spain_EN                      | Els_Trocs            | EN    | Els Trocs, Spain; Troc3                                                   | 5178-5066 cal BC (MAMS 16161)    | Spain   | M   | pre-T2c1d2         | R1b1       | 297595         |
| 10411    | Spain_EN_relative_of_10410    | Els_Trocs            | EN    | Els Trocs, Spain; Troc4                                                   | 5177-5068 cal BC (MAMS 16162)    | Spain   | M   | K1a2a              | F*         | 31507          |
| 10412    | Spain_EN                      | Els_Trocs            | EN    | Els Trocs, Spain; Troc 5                                                  | 5310-5206 cal BC (MAMS 16164)    | Spain   | M   | N1a1a1             | I2a1b1     | 333940         |
| 10413    | Spain_EN                      | Els_Trocs            | EN    | Els Trocs, Spain; Troc7                                                   | 5303-5204 cal BC (MAMS 16166)    | Spain   | F   | V                  |            | 295844         |
| 10405    | Spain_MN                      | La_Mina              | MN    | La Mina, Spain; Mina3                                                     | 3900-3600 BC                     | Spain   | M   | K1a1b1             | I2a1a1/H2? | 133230         |
| 10406    | Spain_MN                      | La_Mina              | MN    | La Mina, Spain; Mina4                                                     | 3900-3600 BC                     | Spain   | M   | H1                 | I2a2a1     | 324169         |
| 10407    | Spain_MN                      | La_Mina              | MN    | La Mina, Spain; Mina6b                                                    | 3900-3600 BC                     | Spain   | F   | K1b1a1             |            | 236225         |
| 10408    | Spain_MN                      | La_Mina              | MN    | La Mina, Spain; Mina18a                                                   | 3900-3600 BC                     | Spain   | F   | pre-U5b1i          |            | 321761         |
| 10172    | Esperstedt_MN                 | Salzmünde/Bernburg   | MN    | Esperstedt, Germany; ESP24, feature 1841                                  | 3360-3086 cal BC (Erl8699)       | Germany | M   | T2b                | I2a1b1a    | 279147         |
| 10559    | Baalberge_MN                  | Baalberge            | MN    | Quedlinburg, Germany; QLB15D, feature 21033                               | 3645-3537 cal BC (MAMS 22818)    | Germany | M   | HV6'17             | R*?        | 64304          |
| 10560    | Baalberge_MN                  | Baalberge            | MN    | Quedlinburg, Germany; QLB18A, feature 21039                               | 3640-3510 cal BC (Er7856)        | Germany | F   | T2e1               |            | 133305         |
| 10807    | Baalberge_MN                  | Baalberge            | MN    | Esperstedt, Germany; ESP30, feature 6220                                  | 3887-3797 cal BC (Er7784)        | Germany | M   | H1e1a              | F*         | 33481          |
| 10231    | Yamnaya                       | Yamnaya              | EBA   | E katerinovka_ Southern Steppe, Samara , Russia, SVP3                     | 2910-2875 cal BC (Beta 392487)   | Russia  | M   | U4a1               | R1b1a2a2   | 348142         |
| 10357    | Yamnaya                       | Yamnaya              | EBA   | Lopatino I, Sok River, Samara, Russia; SVP5 same sample as SVP37          | 3090-2910 BC (Beta 392489)       | Russia  | F   | W6                 |            | 163845         |
| 10370    | Yamnaya                       | Yamnaya              | EBA   | Ishkinovka I, Eastern Orenburg, Pre-Ural steppe, Samara, Russia; SVP10    | 3300-2700 BC                     | Russia  | M   | H13a1a1a           | R1b1a2a2   | 199345         |
| 10429    | Yamnaya                       | Yamnaya              | EBA   | Lopatino I, Sok River, Samara, Russia, SVP38                              | 3339-2917 cal BC (AA47804)       | Russia  | M   | T2c1a2             | R1b1a2a2   | 217664         |
| 10438    | Yamnaya                       | Yamnaya              | EBA   | Luziki I, Samara River, Samara, Russia; SVP50                             | 3021-2635 cal BC (AA47807)       | Russia  | M   | U5a1a1             | R1b1a2a2   | 213493         |
| 10439    | Yamnaya                       | Yamnaya              | EBA   | Lopatino I, Sok River, Samara, Russia, SVP52                              | 3305-2925 cal BC (Beta 392491)   | Russia  | M   | U5a1a1             | R1b1a      | 98900          |
| 10441    | Yamnaya                       | Yamnaya              | EBA   | Kurmanaevskii III, Buzuluk, Samara, Russia; SVP54                         | 3010-2622 cal BC (AA47805)       | Russia  | F   | H2b                |            | 51326          |
| 10443    | Yamnaya                       | Yamnaya              | EBA   | Lopatino II, Sok River, Samara, Russia; SVP57                             | 3300-2700 BC                     | Russia  | M   | W3a1a              | R1b1a2a    | 343890         |
| 10444    | Yamnaya                       | Yamnaya              | EBA   | Kutuluk I, Kutuluk River, Samara, Russia; SVP58                           | 3300-2700 BC                     | Russia  | M   | H6a1b              | R1b1a2a2   | 187126         |
| 10550    | Karsdorf_LN                   | unknown              | LN    | Karsdorf, Germany; KAR22a, feature 191                                    | 2564-2475 cal BC (MAMS 23344)    | Germany | F   | T1a1               |            | 59907          |
| 10103    | Corded_Ware_LN                | Corded Ware          | LN    | Esperstedt, Germany; ESP16, feature 6236                                  | 2566-2477 cal BC (MAMS 21488)    | Germany | F   | W6a                |            | 336918         |
| 10049    | Corded_Ware_LN                | Corded Ware          | LN    | Esperstedt, Germany; ESP22, feature 6140                                  | 2454-2291 cal BC (MAMS 21489)    | Germany | F   | X2b4               |            | 167170         |
| 10106    | Corded_Ware_LN                | Corded Ware          | LN    | Esperstedt, Germany; ESP26, feature 6233.1                                | 2454-2291 cal BC (MAMS 21490)    | Germany | F   | T2a1b1             |            | 69886          |
| 10104    | Corded_Ware_LN                | Corded Ware          | LN    | Esperstedt, Germany; ESP11, feature 6216                                  | 2473-2348 cal BC (MAMS 21487)    | Germany | M   | U4b1a1a1           | R1a1a1     | 336637         |
| 10059    | Benzigerode-Heimburg_LN       | Bell Beaker?         | LN    | Benzigerode-Heimburg, Germany; BZH6, grave 2, feature/find 1287/1036      | 2286-2153 cal BC (MAMS 21486)    | Germany | F   | H1 /H1b'ad         |            | 241081         |
| 10058    | Benzigerode-Heimburg_LN       | Bell Beaker          | LN    | Benzigerode-Heimburg, Germany; BZH4, grave 7, feature 4607                | 2283-2146 cal BC (MAMS 21491)    | Germany | F   | H1e                |            | 246728         |
| 10171    | Benzigerode-Heimburg_LN       | Bell Beaker?         | LN    | Benzigerode-Heimburg, Germany; BZH12, grave 3, feature 6256               | 2204-2136 cal BC (KIA27952)      | Germany | F   | U5a1a2a            |            | 66800          |
| 10112    | Bell_Beaker_LN                | Bell Beaker          | LN    | Quedlinburg XII, Germany; QUEXII6, feature 6256                           | 2340-2190 cal BC (Er7038)        | Germany | F   | H13a1a2            |            | 341003         |
| 10113    | Bell_Beaker_LN                | Bell Beaker          | LN    | Quedlinburg XII, Germany; QUEXII4, feature 6255.1                         | 2290-2130 cal BC (Er7283)        | Germany | F   | J1c5               |            | 190352         |
| 10108    | Bell_Beaker_LN                | Bell Beaker          | LN    | Rothenschirmbach, Germany; ROT6, feature 10044                            | 2497-2436 cal BC (Er8710)        | Germany | F   | H5a3               |            | 260528         |
| 10111    | Bell_Beaker_LN                | Bell Beaker          | LN    | Rothenschirmbach, Germany; ROT4, feature 10142                            | 2414-2333 cal BC (Er8712)        | Germany | F   | H3new              |            | 208256         |
| 10060    | Bell_Beaker_LN                | Bell Beaker          | LN    | Rothenschirmbach, Germany; ROT3, feature 10011                            | 2294-2206 cal BC (MAMS 22819)    | Germany | F   | K1a2c              |            | 47085          |
| 10806    | Bell_Beaker_LN                | Bell Beaker          | LN    | Quedlinburg VII 2, Germany; QLB28b, feature 19617                         | 2296-2206 cal BC (MAMS 22820)    | Germany | M   | H1                 | R1b1a2a1a2 | 91757          |
| 10118    | Alberstedt_LN                 | unknown              | LN    | Alberstedt, Germany; ALB3, feature 7144.2                                 | 2459-2345 cal BC (MAMS 21492)    | Germany | F   | HV6'17             |            | 349956         |
| 10114    | Unetice_EBA_relative_of_10117 | Unetice              | EBA   | Esperstedt, Germany; ESP2, feature 3340.1                                 | 2131-1979 cal BC (MAMS 21493)    | Germany | M   | I3a                | I2a2       | 217031         |
| 10115    | Unetice_EBA                   | Unetice              | EBA   | Esperstedt, Germany; ESP3, feature 1559.1                                 | 1931-1780 cal BC (MAMS 21494)    | Germany | F   | U5a1               |            | 123744         |
| 10116    | Unetice_EBA                   | Unetice              | EBA   | Esperstedt, Germany; ESP4, feature 3322/3323                              | 2118-1961 cal BC (MAMS 21495)    | Germany | M   | W3a1               | I2c2       | 308158         |
| 10117    | Unetice_EBA                   | Unetice              | EBA   | Esperstedt, Germany; ESP29, feature 3332/3333                             | 2199-2064 cal BC (MAMS 21496)    | Germany | F   | I3a                |            | 279996         |
| 10164    | Unetice_EBA                   | Unetice              | EBA   | Quedlinburg VIII, Germany; QUEVII6, feature 3580                          | 2012-1919 cal BC (MAMS 21497)    | Germany | F   | pre-U5b2a1b        |            | 332832         |
| 10803    | Unetice_EBA                   | Unetice              | EBA   | Eulau, Germany; EUL41A, feature 882                                       | 2115-1966 cal BC (MAMS 22822)    | Germany | F   | H4a1a1             |            | 144186         |
| 10804    | Unetice_EBA                   | Unetice              | EBA   | Eulau, Germany; EUL57B, feature1911.5                                     | 2131-1982 cal BC (MAMS 22821)    | Germany | M   | H3                 | I2         | 22869          |
| 10047    | Unetice_EBA                   | Unetice              | EBA   | Halberstadt-Sonntagsfeld, Germany; HAL16, grave 19, feature 613.1         | 2022-1937 cal BC (MAMS 21481)    | Germany | F   | V                  |            | 288353         |
| 10099    | Halberstadt_LBA               | Late Bronze Age      | LBA   | Halberstadt-Sonntagsfeld, Germany; HAL36C, grave 40, feature 1114         | 1113-1021 cal BC (MAMS 21484)    | Germany | M   | H23                | R1a1a1b1a2 | 337566         |
